# Supplementary material for: An Exact Algorithm for the Pickup and Delivery Problem with Time Windows and Last-in-First-out Loading
Source: Atypon-hosted journal article supplement (doi:10.1287/trsc.2019.0905), 2019-09-11
Supplement: trsc.2019.0905.sm1.pdf [file trsc.2019.0905.sm1.pdf]

## **Electronic Companion.**

**“An Exact Algorithm for the Pickup and Delivery Problem with Time Windows and LIFO Loading” by Ali Mehsin Alyasiry, Michael Forbes, and Michael Bulmer.**

---

## Appendix A: Computational Results setting $\delta = 1$

To evaluate the impact of the parameter  $\delta$  we provide computational results setting  $\delta = 1$  and time limit to 3,600 seconds. The columns of tables EC.1, EC.2, EC.3 and EC.4 represent the following: *Name*: the instances name;  $Z_R$ : the lower bound at the root node (i.e., the LP relaxation of PDPTWL-R augmented with the integer lower bound on the number of vehicles); *Time*: the total computing time in seconds;  $Z^*$ : the optimal solution obtained, otherwise we report, in bold, the best upper bound (feasible solution) obtained or left blank if no feasible solution found within the time limit;  $Z_{LB}$ : the best lower bound (LB relaxation) at a child node if the instance was not solved to optimality within the time limit, left blank otherwise;  $F_N$ : the total number of original fragments;  $TF_N$ : the total number of undominated timed fragments; *Nodes*: the number of nodes that have been explored in the branch and bound tree;  $LC$ : the total number of lazy constraints used in any solution.

Table EC.1: Computational results ( $\delta = 1$ )

| <i>Name</i> | $F_N$  | $TF_N$  | $Z_R$     | $Z_{LB}$  | <i>Nodes</i> | $LC$ | <i>Time</i> | $Z^*$            |
|-------------|--------|---------|-----------|-----------|--------------|------|-------------|------------------|
| AA30        | 176    | 1,782   | 31,129.13 |           | 0            | 0    | 1.3         | 31,129.13        |
| AA35        | 294    | 2,690   | 31,284.77 |           | 0            | 0    | 1.2         | 31,293.74        |
| AA40        | 368    | 3,159   | 41,348.80 |           | 0            | 0    | 1.0         | 41,348.80        |
| AA45        | 623    | 4,115   | 41,520.87 |           | 0            | 0    | 1.5         | 41,520.87        |
| AA50        | 768    | 5,112   | 41,643.10 |           | 0            | 0    | 2.1         | 41,643.10        |
| AA55        | 935    | 6,160   | 51,742.52 |           | 0            | 0    | 2.6         | 51,742.52        |
| AA60        | 1,015  | 6,759   | 51,927.76 |           | 0            | 0    | 6.8         | 51,949.04        |
| AA65        | 1,118  | 7,464   | 52,059.30 |           | 0            | 1    | 6.9         | 52,076.67        |
| AA70        | 1,469  | 9,151   | 52,210.63 |           | 0            | 0    | 7.2         | 52,218.44        |
| AA75        | 2,498  | 13,337  | 52,326.92 |           | 0            | 0    | 11.4        | 52,329.30        |
| BB30        | 145    | 1,158   | 31,074.09 |           | 0            | 1    | 1.2         | 31,077.12        |
| BB35        | 267    | 1,936   | 31,310.77 |           | 0            | 1    | 1.0         | 31,311.97        |
| BB40        | 342    | 2,564   | 41,397.36 |           | 0            | 0    | 2.4         | 41,403.49        |
| BB45        | 540    | 3,780   | 41,519.72 |           | 90           | 0    | 6.8         | 41,536.99        |
| BB50        | 706    | 4,925   | 41,774.53 |           | 0            | 1    | 3.5         | 41,790.49        |
| BB55        | 799    | 5,565   | 51,894.39 |           | 178          | 1    | 11.2        | 51,911.05        |
| BB60        | 742    | 5,143   | 62,280.82 |           | 0            | 3    | 4.0         | 62,304.78        |
| BB65        | 801    | 5,606   | 62,514.38 |           | 13           | 2    | 9.8         | 62,563.85        |
| BB70        | 997    | 6,855   | 72,528.06 |           | 0            | 0    | 15.4        | 72,534.42        |
| BB75        | 1,446  | 8,805   | 72,644.69 |           | 34           | 0    | 22.2        | 72,655.87        |
| CC30        | 241    | 9,814   | 31,086.67 |           | 0            | 0    | 14.2        | 31,088.20        |
| CC35        | 438    | 14,833  | 31,232.69 |           | 0            | 0    | 24.9        | 31,237.04        |
| CC40        | 1,021  | 28,693  | 31,335.62 |           | 82           | 0    | 93.8        | 31,339.79        |
| CC45        | 2,359  | 53,865  | 31,487.28 | 31,525.87 | 23,735       | 13   | 3,600.0     | <b>31,532.09</b> |
| CC50        | 3,813  | 76,858  | 41,662.26 |           | 1,172        | 1    | 1,113.6     | 41,673.05        |
| CC55        | 5,294  | 98,541  | 41,776.14 |           | 2,056        | 4    | 1,267.4     | 41,792.84        |
| CC60        | 6,589  | 120,878 | 41,934.61 |           | 2,163        | 0    | 1,280.6     | 41,946.63        |
| CC65        | 9,243  | 160,111 | 42,056.52 | 42,058.98 | 2,749        | 0    |             |                  |
| CC70        | 13,888 | 221,355 | 42,243.43 | 42,244.32 | 1,433        | 0    |             |                  |
| CC75        | 19,480 | 302,256 | 52,283.07 | 52,294.88 | 1,951        | 5    | 3,600.0     | <b>52,316.09</b> |
| DD30        | 1,437  | 25,383  | 21,079.16 |           | 2,464        | 1    | 406.7       | 21,102.82        |
| DD35        | 3,052  | 49,033  | 21,340.89 |           | 31           | 0    | 123.3       | 31,127.43        |
| DD40        | 5,196  | 79,021  | 31,242.14 |           | 0            | 0    | 23.9        | 31,244.79        |
| DD45        | 8,940  | 124,040 | 31,344.15 |           | 0            | 0    | 50.1        | 31,349.87        |
| DD50        | 16,064 | 211,385 | 31,438.30 |           | 119          | 2    | 194.4       | 31,449.70        |
| DD55        | 25,271 | 316,750 | 31,590.32 | 31,596.03 | 1,440        | 11   |             |                  |
| DD60        | 39,687 | 466,993 | 31,768.22 | 31,778.29 | 1,031        | 4    | 3,600.0     | <b>31,814.13</b> |
| DD65        | 25,579 | 306,298 | 41,967.35 |           | 446          | 0    | 1,381.1     | 41,984.09        |
| DD70        | 40,855 | 451,227 | 42,067.83 |           | 1,744        | 2    | 2,387.4     | 42,092.28        |
| DD75        | 62,468 | 640,506 | 42,190.34 | 42,190.34 | 172          | 2    |             |                  |

Table EC.2: Computational results ( $\delta = 1$ )

| <i>Name</i> | $F_N$ | $TF_N$ | $Z_R$     | $Z_{LB}$ | <i>Nodes</i> | <i>LC</i> | <i>Time</i> | $Z^*$     |
|-------------|-------|--------|-----------|----------|--------------|-----------|-------------|-----------|
| AA*30       | 271   | 287    | 31,051.08 |          | 0            | 0         | 1.2         | 31,051.20 |
| AA*35       | 415   | 448    | 31,231.30 |          | 0            | 0         | 0.9         | 31,244.37 |
| AA*40       | 569   | 604    | 41,318.38 |          | 0            | 0         | 0.9         | 41,330.99 |
| AA*45       | 882   | 922    | 41,505.21 |          | 0            | 0         | 2.1         | 41,514.90 |
| AA*50       | 1,073 | 1,124  | 41,612.97 |          | 25           | 0         | 2.3         | 41,636.97 |
| AA*55       | 1,283 | 1,342  | 41,842.35 |          | 0            | 0         | 3.9         | 41,879.62 |
| AA*60       | 1,381 | 1,447  | 51,807.57 |          | 0            | 0         | 2.3         | 51,807.57 |
| AA*65       | 1,522 | 1,591  | 51,952.25 |          | 0            | 1         | 3.9         | 51,961.24 |
| AA*70       | 1,939 | 2,027  | 52,137.83 |          | 268          | 3         | 10.0        | 52,170.77 |
| AA*75       | 3,116 | 3,217  | 52,265.70 |          | 311          | 6         | 14.5        | 52,298.84 |
| BB*30       | 169   | 180    | 41,105.43 |          | 0            | 0         | 0.6         | 41,110.65 |
| BB*35       | 307   | 327    | 41,329.09 |          | 11           | 1         | 1.0         | 41,332.47 |
| BB*40       | 381   | 404    | 41,463.74 |          | 0            | 0         | 1.4         | 41,476.65 |
| BB*45       | 596   | 629    | 41,645.10 |          | 21           | 2         | 2.3         | 41,698.98 |
| BB*50       | 773   | 814    | 51,681.97 |          | 133          | 0         | 3.4         | 51,718.58 |
| BB*55       | 926   | 971    | 51,937.74 |          | 1,395        | 5         | 16.8        | 52,033.90 |
| BB*60       | 1,025 | 1,070  | 72,168.09 |          | 0            | 2         | 4.0         | 72,183.56 |
| BB*65       | 1,111 | 1,158  | 72,346.54 |          | 174          | 3         | 5.0         | 72,393.77 |
| BB*70       | 1,383 | 1,444  | 72,555.38 |          | 175          | 2         | 7.4         | 72,604.07 |
| BB*75       | 1,930 | 1,997  | 72,675.02 |          | 180          | 6         | 10.6        | 72,746.85 |

Table EC.3: Computational results ( $\delta = 1$ )

| <i>Name</i> | $F_N$ | $TF_N$ | $Z_R$      | $Z_{LB}$ | <i>Nodes</i> | <i>LC</i> | <i>Time</i> | $Z^*$      |
|-------------|-------|--------|------------|----------|--------------|-----------|-------------|------------|
| AA80        | 1,826 | 11,260 | 62,520.77  |          | 134          | 3         | 27.4        | 62,541.33  |
| AA85        | 2,508 | 15,060 | 72,696.41  |          | 31           | 0         | 24.9        | 72,703.23  |
| AA90        | 2,492 | 17,136 | 63,154.47  |          | 1,422        | 9         | 192.3       | 72,924.18  |
| AA95        | 3,117 | 19,874 | 63,147.64  |          | 7,061        | 37        | 1,171.0     | 63,260.65  |
| AA100       | 2,747 | 17,529 | 73,384.93  |          | 1,436        | 10        | 153.2       | 73,424.04  |
| AA105       | 4,194 | 23,189 | 83,495.18  |          | 1,323        | 0         | 128.5       | 83,522.13  |
| AA110       | 3,561 | 20,724 | 83,253.67  |          | 436          | 3         | 140.1       | 83,268.80  |
| AA115       | 4,729 | 26,380 | 93,664.54  |          | 354          | 0         | 89.8        | 93,690.44  |
| AA120       | 3,790 | 24,368 | 103,951.74 |          | 232          | 5         | 61.2        | 103,963.13 |
| AA125       | 4,829 | 29,041 | 93,827.53  |          | 441          | 3         | 116.2       | 93,840.61  |
| BB80        | 2,356 | 14,143 | 62,709.36  |          | 1,210        | 7         | 240.5       | 62,743.40  |
| BB85        | 2,372 | 14,328 | 62,651.09  |          | 1,396        | 2         | 159.1       | 62,688.02  |
| BB90        | 2,773 | 16,251 | 82,969.78  |          | 341          | 1         | 36.7        | 82,985.83  |
| BB95        | 3,016 | 19,509 | 63,237.19  |          | 1,153        | 3         | 266.8       | 73,005.02  |
| BB100       | 3,334 | 21,613 | 73,026.31  |          | 761          | 2         | 112.7       | 73,059.83  |
| BB105       | 8,852 | 47,421 | 72,979.73  |          | 3,669        | 20        | 858.4       | 73,032.72  |
| BB110       | 5,087 | 27,332 | 73,463.63  |          | 2,970        | 5         | 722.3       | 73,543.43  |
| BB115       | 4,811 | 28,277 | 83,750.81  |          | 3,255        | 25        | 1,086.8     | 83,812.37  |
| BB120       | 9,500 | 48,836 | 83,650.85  |          | 2,631        | 14        | 1,335.4     | 83,700.24  |
| BB125       | 6,480 | 36,196 | 93,825.12  |          | 2,258        | 3         | 606.4       | 93,868.50  |

Table EC.4: Computational results ( $\delta = 1$ )

| <i>Name</i> | $F_N$  | $TF_N$ | $Z_R$     | $Z_{LB}$  | <i>Nodes</i> | <i>LC</i> | <i>Time</i> | $Z^*$            |
|-------------|--------|--------|-----------|-----------|--------------|-----------|-------------|------------------|
| AA*80       | 2,531  | 2,617  | 62,549.18 |           | 616          | 10        | 33.9        | 62,588.19        |
| AA*85       | 3,565  | 3,700  | 72,589.79 |           | 2,385        | 3         | 40.1        | 72,633.39        |
| AA*90       | 3,413  | 3,681  | 72,869.41 |           | 1,237        | 23        | 124.9       | 72,923.07        |
| AA*95       | 4,447  | 4,673  | 72,923.12 |           | 2,072        | 5         | 175.7       | 72,996.92        |
| AA*100      | 4,076  | 4,234  | 83,240.77 |           | 30           | 0         | 17.9        | 83,254.93        |
| AA*105      | 5,638  | 5,874  | 83,270.80 |           | 1,351        | 12        | 101.9       | 83,349.25        |
| AA*110      | 5,315  | 5,575  | 83,173.48 |           | 1,436        | 7         | 103.0       | 83,232.45        |
| AA*115      | 7,171  | 7,445  | 93,511.66 |           | 889          | 9         | 124.1       | 93,577.39        |
| AA*120      | 5,668  | 5,927  | 93,857.13 |           | 1,173        | 4         | 120.2       | 93,899.67        |
| AA*125      | 7,273  | 7,530  | 83,738.36 |           | 7,254        | 13        | 926.8       | 83,844.43        |
| BB*80       | 2,803  | 2,967  | 62,803.09 |           | 466          | 4         | 36.8        | 72,556.05        |
| BB*85       | 2,769  | 2,892  | 62,633.73 |           | 1,332        | 3         | 52.6        | 62,718.69        |
| BB*90       | 3,439  | 3,596  | 72,970.80 |           | 806          | 3         | 68.5        | 73,075.64        |
| BB*95       | 3,856  | 4,081  | 72,972.30 |           | 511          | 0         | 30.1        | 73,001.11        |
| BB*100      | 4,385  | 4,621  | 73,121.12 |           | 500          | 4         | 64.4        | 73,210.37        |
| BB*105      | 10,206 | 10,537 | 73,014.55 |           | 5,450        | 21        | 838.2       | 73,132.54        |
| BB*110      | 6,110  | 6,381  | 83,421.67 |           | 6,940        | 35        | 737.9       | 83,540.28        |
| BB*115      | 6,699  | 6,944  | 93,581.56 |           | 1,135        | 0         | 107.5       | 93,619.79        |
| BB*120      | 11,417 | 11,984 | 83,564.85 | 83,686.01 | 14,864       | 14        | 3,600.0     | <b>83,714.11</b> |
| BB*125      | 8,334  | 8,682  | 93,783.97 |           | 3,946        | 8         | 473.6       | 93,883.89        |
